# Supplementary material for: 13C Metabolic Flux Analysis Identifies an Unusual Route for Pyruvate Dissimilation in Mycobacteria which Requires Isocitrate Lyase and Carbon Dioxide Fixation
Source: PLoS Pathog. 2011 Jul 21;7(7):e1002091. doi: 10.1371/journal.ppat.1002091 (PMC3141028; doi:10.1371/journal.ppat.1002091)
Supplement: Table S4 — Experimental (GC-MS) and calculated mass distributions in the amino acid derivatives of Mycobacterium bovis BCG (BCG) and Mycobacterium tuberculosis (MTB) growing in a steady state chemostat. GC-MS measured values for the 13C incorporation into proteogenic amino acids as compared with the values calculated using 13CFlux. (XLS) [file ppat.1002091.s005.xls]

## Sheet: Sheet1
Table S4. Experimental (GC-MS) and calculated mass distributions in the amino acid derivatives of Mycobacterium bovis BCG (BCG) and Mycobacterium tuberculosis (MTB) growing in a steady state chemostat
Analyte (m/z)		80% [12C], 20% [U-13C] glycerol								0.15% [13C] CO2	0.15% [13C] CO2
		µ = 0.01 h-1 (td = 69 h)						µ = 0.03 h-1 (td = 23 h)		µ = 0.01 h-1 (td = 69 h)	µ = 0.03 h-1 (td = 23 h)
		Experimental BCG	Calculated BCG (solution 1)	Calculated BCG (solution 2)	Experimental MTB	Calculated MTB (solution 1)	Calculated MTB (solution 2)	Experimental BCG	Calculated BCG (solution 1)	Experimental MTB	Experimental MTB
ALA260	m+0	0.796 ± 0.016	0.79959	0.801477	0.778 ± 0.004	0.813219	0.813794	0.806 ± 0.016	0.828647	0.991 ± 0.003	0.980 ± 0.020
	m+1	0.040 ± 0.002	0.0384692	0.0385944	0.048 ± 0.003	0.0329991	0.0326096	0.023 ± 0.002	0.0282785	0.002 ± 0.002	0.015 ± 0.001
	m+2	0.030 ± 0.001	0.0132083	0.0132539	0.031 ± 0.003	0.0081324	0.0072303	0.023 ± 0.002	0.0042922	0.006 ± 0.002	0.004 ± 0.001
	m+3	0.134 ± 0.007	0.148732	0.146674	0.144 ± 0.003	0.145649	0.146366	0.149 ± 0.003	0.138782	0.0004 ± 0.006	0.000 ± 0.000
ALA232	m+0	0.799 ± 0.016	0.812052	0.814029	0.791 ± 0.004	0.824171	0.824378	0.802 ± 0.016	0.838073	0.982 ± 0.006	0.982 ± 0.020
	m+1	0.058 ± 0.004	0.0351619	0.0351712	0.057 ± 0.006	0.0275104	0.0271586	0.038 ± 0.006	0.0217138	0.007 ± 0.004	0.007 ± 0.004
	m+2	0.143 ± 0.005	0.152786	0.1508	0.153 ± 0.003	0.148319	0.148464	0.160 ± 0.004	0.140213	0.011 ± 0.001	0.011 ± 0.001
ASP418	m+0	0.784 ± 0.131	0.664267	0.661456	0.708 ± 0.011	0.674035	0.669518	0.678 ± 0.014	0.712415	0.983 ± 0.013	0.907 ± 0.018
	m+1	0.130 ± 0.034	0.128178	0.12901	0.144 ± 0.006	0.140925	0.147168	0.142 ± 0.005	0.157205	0.007 ± 0.007	0.082 ± 0.014
	m+2	0.066 ± 0.025	0.128116	0.127757	0.109 ± 0.005	0.109887	0.106096	0.110 ± 0.004	0.0668321	0.006 ± 0.005	0.007 ± 0.001
	m+3	0.023 ± 0.009	0.0601556	0.0620953	0.031 ± 0.005	0.0593842	0.0618912	0.057 ± 0.001	0.0533997	0.002 ± 0.002	0.003 ± 0.001
	m+4	0.016 ± 0.020	0.0192836	0.0196813	0.009 ± 0.003	0.0157686	0.0153269	0.014 ± 0.001	0.010148	0.002 ± 0.001	0.001 ± 0.000
ASP390	m+0	n.a.	0.708504	0.706251	0.729 ± 0.006	0.720795	0.710008	n.a.	0.763538	n.a.	n.a.
	m+1	n.a.	0.148036	0.14813	0.156 ± 0.004	0.148951	0.156155	n.a.	0.139086	n.a.	n.a.
	m+2	n.a.	0.0968045	0.0976677	0.093 ± 0.006	0.0882182	0.104348	n.a.	0.065345	n.a.	n.a.
	m+3	n.a.	0.0466553	0.0479515	0.023 ± 0.003	0.0420351	0.0294884	n.a.	0.032031	n.a.	n.a.
GLU432	m+0	0.622 ± 0.043	0.586497	0.579595	0.647 ± 0.014	0.60695	0.601278	0.616 ± 0.013	0.63416	0.988 ± 0.012	0.977 ± 0.020
	m+1	0.155 ± 0.024	0.156983	0.158481	0.178 ± 0.028	0.157895	0.151413	0.156 ± 0.006	0.212326	0.005 ± 0.008	0.009 ± 0.008
	m+2	0.192 ± 0.029	0.172105	0.173945	0.1456 ± 0.021	0.162371	0.182144	0.154 ± 0.005	0.105132	0.003 ± 0.003	0.013 ± 0.001
	m+3	0.062 ± 0.006	0.0628734	0.064976	0.038 ± 0.006	0.0561861	0.0474873	0.052 ± 0.003	0.0389375	0.003 ± 0.002	0.000 ± 0.020
	m+4	n.d.	0.015812	0.0169588	0.011 ±0.002	0.0118532	0.0139585	0.015 ± 0.001	0.00808083	0.001 ± 0.001	0.001 ± 0.000
	m+5	n.d.	0.00572957	0.00604484	0.004 ± 0.001	0.00474568	0.00371961	0.006 ± 0.002	0.00136372	0.001 ± 0.000	0.001 ± 0.000
GLU404	m+0	n.a.	0.63458	0.629606	0.695 ± 0.007	0.648423	0.650507	n.a.	0.720993	n.a.	n.a.
	m+1	n.a.	0.162573	0.160666	0.169 ± 0.006	0.168206	0.155969	n.a.	0.153714	n.a.	n.a.
	m+2	n.a.	0.162272	0.165709	0.107 ± 0.002	0.154194	0.162328	n.a.	0.0970935	n.a.	n.a.
	m+3	n.a.	0.0294818	0.0319238	0.022 ± 0.002	0.0211173	0.0220909	n.a.	0.0227819	n.a.	n.a.
	m+4	n.a.	0.0110936	0.0120948	0.007 ± 0.002	0.00805979	0.00910442	n.a.	0.00541723	n.a.	n.a.
GLY246	m+0	0.841 ± 0.017	0.817828	0.820195	0.83 ± 0.002	0.826528	0.826583	0.819 ± 0.016	0.838073	0.968 ± 0.004	0.953 ± 0.019
	m+1	0.004 ± 0.006	0.0216724	0.0216774	0.004 ± 0.001	0.021806	0.0219961	0.019 ± 0.001	0.0217138	0.028 ± 0.003	0.044 ± 0.001
	m+2	0.156 ± 0.007	0.160499	0.158128	0.166 ± 0.001	0.151666	0.151421	0.161 ± 0.003	0.140213	0.004 ± 0.001	0.003 ± 0.001
GLY218	m+0	0.827 ± 0.017	0.828664	0.831033	0.821 ± 0.002	0.837431	0.83758	0.831 ± 0.017	0.84893	0.997 ± 0.003	0.997 ± 0.020
	m+1	0.173 ± 0.006	0.171336	0.168967	0.179 ± 0.002	0.162569	0.16242	0.169 ± 0.003	0.15107	0.003 ± 0.004	0.003 ± 0.004
HIS440	m+0	0.577 ± 0.075	0.586699	0.591001	0.510 ± 0.016	0.602752	0.590962	0.537 ± 0.012	0.646024	0.987 ± 0.008	0.974 ± 0.019
	m+1	0.183 ± 0.035	0.186788	0.186052	0.181 ± 0.010	0.183805	0.20726	0.177 ± 0.008	0.136924	0.004 ± 0.005	0.020 ± 0.013
	m+2	0.106 ± 0.024	0.0644198	0.0632742	0.116 ± 0.009	0.060394	0.049378	0.107 ± 0.009	0.0750117	0.006 ± 0.005	0.002 ± 0.003
	m+3	0.098 ± 0.006	0.118158	0.116897	0.119 ± 0.010	0.113384	0.110751	0.111 ± 0.006	0.111104	0.007 ± 0.001	0.004 ± 0.000
	m+4	0.055 ± 0.015	0.0330978	0.0323377	0.046 ± 0.004	0.030248	0.034443	0.048 ± 0.006	0.0195907	0.002 ± 0.001	0.000 ± 0.020
	m+5	0.018 ± 0.003	0.0108374	0.0104383	0.022 ± 0.006	0.009416	0.007206	0.019 ± 0.006	0.011346	0.000 ± 0.000	0.000 ± 0.020
HIS412	m+0	n.a.	0.593375	0.597724	0.534 ± 0.035	0.609677	0.59788	0.522 ± 0.012	0.653373	0.975 ± 0.012	0.975 ± 0.019
	m+1	n.a.	0.184387	0.183567	0.193 ±0.016	0.181068	0.204819	0.192 ± 0.007	0.133113	0.000 ± 0.000	0.000 ± 0.000
	m+2	n.a.	0.17671	0.174372	0.195 ± 0.010	0.168095	0.154346	0.187 ± 0.006	0.180838	0.018 ± 0.009	0.018 ± 0.009
	m+3	n.a.	0.0345785	0.0337906	0.081 ± 0.009	0.0316415	0.0356649	0.071 ± 0.007	0.0212133	0.021 ± 0.000	0.021 ± 0.000
	m+4	n.a.	0.010949	0.0105459	0.033 ± 0.003	0.00951813	0.00728989	0.027 ± 0.005	0.011463	0.000 ± 0.000	0.000 ± 0.020
ILEU404	m+0	0.645 ± 0.016	0.539419	0.538444	0.684 ± 0.002	0.55552	0.551936	0.655 ± 0.013	0.597055	0.980 ± 0.006	0.911 ± 0.018
	m+1	0.120 ± 0.006	0.127444	0.128282	0.107 ± 0.001	0.13469	0.139505	0.112 ± 0.003	0.147219	0.011 ± 0.007	0.080 ± 0.003
	m+2	0.158 ± 0.011	0.210034	0.208283	0.155 ± 0.002	0.194414	0.190859	0.157 ± 0.003	0.159314	0.005 ± 0.001	0.006 ± 0.000
	m+3	0.049 ± 0.007	0.0729381	0.0744954	0.030 ± 0.002	0.0728676	0.0757522	0.046 ± 0.003	0.0682463	0.003 ± 0.001	0.003 ± 0.000
	m+4	0.022 ± 0.002	0.0373488	0.0374709	0.017 ± 0.001	0.030928	0.0300674	0.020 ± 0.001	0.0190351	0.0007 ± 0.000	0.000 ± 0.020
	m+5	0.006 ± 0.002	0.00986898	0.0100561	0.004 ± 0.001	0.00924159	0.00960486	0.007 ± 0.001	0.0077077	0.000 ± 0.000	0.000 ± 0.020
	m+6	n.d.	0.00294627	0.00296793	0.002 ± 0.001	0.00233878	0.00227549	0.002 ± 0.001	0.00142289	0.000 ± 0.000	0.000 ± 0.020
ILEU376	m+0	0.578 ± 0.017	0.575342	0.574909	0.620 ± 0.003	0.594059	0.585315	0.593 ± 0.012	0.639901	0.967 ± 0.004	0.967 ± 0.019
	m+1	0.148 ± 0.006	0.145126	0.145422	0.139 ± 0.003	0.142591	0.148014	0.135 ± 0.005	0.133143	0.010 ± 0.003	0.010 ± 0.003
	m+2	0.189 ± 0.007	0.192065	0.191217	0.184 ±0.001	0.183712	0.195674	0.190 ± 0.004	0.164842	0.020 ± 0.002	0.020 ± 0.002
	m+3	0.054 ± 0.007	0.0639082	0.064807	0.038 ± 0.001	0.0591633	0.0503269	0.052 ± 0.002	0.0477648	0.003 ± 0.001	0.003 ± 0.001
	m+4	0.020 ± 0.002	0.0164309	0.0164148	0.015 ± 0.002	0.0142408	0.0162928	0.020 ± 0.001	0.00985775	0.001 ± 0.000	0.001 ± 0.001
	m+5	0.017 ± 0.010	0.00712827	0.00723107	0.005 ± 0.001	0.0062346	0.00437796	0.009 ± 0.001	0.00449117	0.001 ± 0.000	0.001 ± 0.001
LEU302	m+0	0.593 ± 0.022	0.55105	0.549159	0.611 ± 0.002	0.572875	0.575525	0.617 ± 0.012	0.637712	0.996 ± 0.002	0.996 ± 0.020
	m+1	0.056 ± 0.004	0.0696738	0.0699772	0.063 ± 0.001	0.0686375	0.056271	0.041 ± 0.003	0.0483968	0.000 ± 0.000	0.000 ± 0.020
	m+2	0.263 ± 0.013	0.296718	0.297397	0.257 ± 0.002	0.284631	0.294852	0.272 ± 0.006	0.26391	0.002 ± 0.001	0.003 ± 0.001
	m+3	0.027 ± 0.006	0.024765	0.025038	0.021 ± 0.002	0.0229897	0.0191068	0.015 ± 0.002	0.0132304	0.001 ± 0.001	0.001 ± 0.000
	m+4	0.053 ± 0.006	0.0525484	0.0530777	0.042 ± 0.001	0.0464801	0.049853	0.048 ± 0.002	0.0345133	0.001 ± 0.000	0.001 ± 0.000
	m+5	0.004 ± 0.001	0.00218531	0.00222905	0.003 ± 0.001	0.00190824	0.00161236	0.003 ± 0.001	0.00085712	0.000 ± 0.000	0.000 ± 0.020
	m+6	0.004 ± 0.001	0.00305944	0.0031216	0.003 ± 0.001	0.00247835	0.00278027	0.004 ± 0.001	0.00138001	0.000 ± 0.000	0.000 ± 0.020
LEU274	m+0	n.a.	0.56298	0.561023	0.595 ± 0.003	0.582404	0.585049	0.595 ± 0.012	0.645974	0.982 ± 0.004	0.982 ± 0.020
	m+1	n.a.	0.162414	0.160845	0.114 ± 0.002	0.162651	0.151011	0.110 ± 0.004	0.14724	0.000 ± 0.002	0.001 ± 0.002
	m+2	n.a.	0.204803	0.207418	0.224 ± 0.002	0.193021	0.20045	0.224 ± 0.004	0.164164	0.001 ± 0.002	0.014 ± 0.002
	m+3	n.a.	0.0481261	0.0483382	0.037 ± 0.001	0.0436308	0.0435579	0.041 ± 0.002	0.0320867	0.001 ± 0.000	0.001 ± 0.000
	m+4	n.a.	0.0182646	0.0188907	0.026 ± 0.001	0.0155844	0.0168978	0.026 ± 0.001	0.0090486	0.001 ± 0.000	0.001 ± 0.000
	m+5	n.a.	0.00341149	0.00348562	0.004 ± 0.001	0.0027081	0.00303338	0.005 ± 0.001	0.00148687	0.000 ± 0.000	0.001 ± 0.000
LYS431	m+0	0.641 ± 0.152	0.559637	0.559089	0.592 ± 0.016	0.585783	0.573823	0.493 ± 0.047	0.60299	0.781 ± 0.017	0.907 ± 0.018
	m+1	0.160 ± 0.016	0.141011	0.141521	0.157 ± 0.015	0.144788	0.148582	0.245 ± 0.028	0.145492	0.204 ± 0.011	0.084 ± 0.003
	m+2	0.100 ± 0.028	0.122294	0.122315	0.138 ± 0.011	0.0839102	0.109862	0.146 ± 0.012	0.143006	0.017 ± 0.816	0.008 ± 0.012
	m+3	0.102 ± 0.011	0.129222	0.129294	0.088 ± 0.013	0.142413	0.123732	0.116 ± 0.009	0.0793514	0.009 ± 0.007	0.000 ± 0.020
	m+4	n.d.	0.0282017	0.0280467	0.027 ± 0.008	0.0238879	0.025417	n.d.	0.0192771	0.000 ± 0.000	0.000 ± 0.020
	m+5	n.d.	0.0137085	0.013725	0.011 ± 0.002	0.0131416	0.0145819	n.d.	0.00795717	0.000 ± 0.000	0.000 ± 0.020
	m+6	n.d.	0.00592588	0.00600886	n.d.	0.0060753	0.00400233	n.d.	0.00192605	0.000 ± 0.000	0.000 ± 0.020
LYS403	m+0	n.a.	0.569191	0.568651	0.644 ± 0.009	0.593694	0.581587	n.a.	0.610635	n.a.	n.a.
	m+1	n.a.	0.164002	0.163878	0.131 ± 0.009	0.143645	0.160894	n.a.	0.223112	n.a.	n.a.
	m+2	n.a.	0.175839	0.17528	0.184 ± 0.009	0.182856	0.182922	n.a.	0.0945284	n.a.	n.a.
	m+3	n.a.	0.0658937	0.0669096	0.042 ± 0.006	0.0592679	0.0532062	n.a.	0.0541533	n.a.	n.a.
	m+4	n.a.	0.0189216	0.0190375	n.d.	0.0143478	0.0173041	n.a.	0.0155461	n.a.	n.a.
	m+5	n.a.	0.00615298	0.00624404	n.d.	0.00618881	0.00408652	n.a.	0.00202554	n.a.	n.a.
MET320	m+0	n.a.	0.664268	0.661456	0.591 ± 0.005	0.674035	0.669518	0.558 ± 0.026	0.712415	0.955 ± 0.019	0.843 ± 0.017
	m+1	n.a.	0.128178	0.12901	0.239 ± 0.003	0.140925	0.147168	0.226 ± 0.011	0.157205	0.031 ± 0.019	0.147 ± 0.011
	m+2	n.a.	0.128115	0.127758	0.108 ± 0.003	0.109887	0.106096	0.116 ± 0.005	0.0668321	0.012 ± 0.005	0.010 ± 0.001
	m+3	n.a.	0.0601555	0.062095	0.045 ± 0.003	0.059384	0.061891	0.075 ± 0.006	0.0533997	0.008 ± 0.003	0.000 ± 0.020
	m+4	n.a.	0.0192834	0.0196813	0.015 ± 0.003	0.015769	0.015327	0.024 ± 0.003	0.010148	0.000 ± 0.000	0.000 ± 0.020
ORN417	m+0	0.662 ± 0.042	0.586495	0.579595	0.673 ± 0.005	0.60695	0.601278	0.614 ± 0.013	0.63416	0.958 ± 0.009	0.909 ± 0.018
	m+1	0.180 ± 0.031	0.156984	0.158481	0.167 ± 0.005	0.157895	0.151413	0.178 ± 0.008	0.212326	0.029 ± 0.008	0.085 ± 0.002
	m+2	0.154 ± 0.020	0.172105	0.173945	0.124 ± 0.005	0.162371	0.182144	0.154 ± 0.007	0.105132	0.012 ± 0.003	0.007 ± 0.008
	m+3	0.051 ± 0.009	0.0628738	0.0649759	0.029 ± 0.002	0.0561861	0.0474873	0.049 ± 0.008	0.0389377	0.005 ± 0.001	0.000 ± 0.020
	m+4	0.014 ± 0.003	0.0158123	0.0169588	0.009 ± 0.001	0.0118532	0.0139585	n.d.	0.00808089	0.000 ± 0.000	0.000 ± 0.020
	m+5	n.d.	0.00572957	0.00604484	n.d.	0.00474568	0.00371961	n.d.	0.00136373	0.000 ± 0.000	0.000 ± 0.020
ORN389	m+0	n.a.	0.63458	0.629606	0.685 ± 0.024	0.648423	0.650507	n.a.	0.720993	n.a.	n.a.
	m+1	n.a.	0.162573	0.160666	0.154 ± 0.005	0.168206	0.155969	n.a.	0.153714	n.a.	n.a.
	m+2	n.a.	0.162272	0.165709	0.118 ± 0.025	0.154194	0.162328	n.a.	0.0970938	n.a.	n.a.
	m+3	n.a.	0.0294818	0.0319238	0.021 ± 0.001	0.0211173	0.0220909	n.a.	0.022782	n.a.	n.a.
	m+4	n.a.	0.0110936	0.0120948	0.023 ± 0.001	0.0080598	0.0091044	n.a.	0.00541728	n.a.	n.a.
PHE336	m+0	0.500 ± 0.116	0.443139	0.448274	0.435 ± 0.004	0.458479	0.459251	0.465 ± 0.014	0.488532	0.988 ± 0.007	0.962 ± 0.019
	m+1	0.121 ± 0.014	0.133612	0.133588	0.136 ± 0.002	0.138732	0.138269	0.113 ± 0.004	0.132937	0.002 ± 0.003	0.027 ± 0.003
	m+2	0.101 ± 0.009	0.102351	0.101737	0.108 ± 0.001	0.101252	0.100848	0.104 ± 0.002	0.0964133	0.007 ± 0.005	0.008 ± 0.003
	m+3	0.168 ± 0.017	0.199759	0.198198	0.188 ± 0.002	0.190917	0.191179	0.191 ± 0.004	0.185237	0.002 ± 0.002	0.003 ± 0.000
	m+4	0.048 ± 0.006	0.0490335	0.0480803	0.056 ± 0.003	0.0468555	0.0466692	0.049 ± 0.003	0.0409533	0.001± 0.000	0.000 ± 0.020
	m+5	0.040 ± 0.005	0.0378488	0.0369486	0.040 ± 0.002	0.0340991	0.0340754	0.040 ± 0.002	0.0303181	0.000 ± 0.000	0.000 ± 0.020
	m+6	0.026 ± 0.004	0.0256246	0.0248976	0.028 ± 0.002	0.0223808	0.0224301	0.029 ± 0.002	0.0197154	0.000 ± 0.000	0.000 ± 0.020
	m+7	n.d.	0.00444472	0.00427297	0.006 ± 0.002	0.00389747	0.0038794	0.009 ± 0.003	0.00310595	0.000 ± 0.000	0.000 ± 0.020
	m+8	n.d.	0.00349317	0.00334931	0.004 ± 0.001	0.00285941	0.00286906	n.d.	0.00238102	0.000 ± 0.000	0.000 ± 0.020
	m+9	n.d.	0.000694001	0.00065451	0.000 ± 0.001	0.00052715	0.000529404	n.d.	0.000407978	0.000 ± 0.000	0.000 ± 0.020
PHE308	m+0	0.561 ± 0.217	0.44818	0.453374	0.442 ± 0.004	0.464656	0.465188	0.467 ± 0.009	0.494089	0.975 ± 0.006	0.975 ± 0.020
	m+1	0.128 ± 0.013	0.131714	0.131618	0.136 ± 0.002	0.137251	0.136725	0.114 ± 0.003	0.130389	0.001 ± 0.002	0.001 ± 0.002
	m+2	0.188 ± 0.012	0.187834	0.186674	0.181 ± 0.003	0.180776	0.181068	0.184 ± 0.004	0.176648	0.02 ± 0.004	0.021 ± 0.004
	m+3	0.132 ± 0.010	0.136036	0.134564	0.132 ± 0.001	0.130227	0.130081	0.130 ± 0.003	0.12291	0.002 ± 0.001	0.002 ± 0.001
	m+4	0.055 ± 0.006	0.0435999	0.0426541	0.052 ± 0.001	0.0407374	0.0406312	0.049 ± 0.002	0.0356398	0.001 ± 0.000	0.001 ± 0.000
	m+5	n.d.	0.0400265	0.0390137	0.043 ± 0.002	0.0356314	0.0356126	0.046 ± 0.002	0.0316415	0.001 ± 0.001	0.000 ± 0.020
	m+6	n.d.	0.00830664	0.00798705	0.011 ± 0.001	0.00720346	0.00717627	0.012 ± 0.002	0.00581421	0.001 ± 0.002	0.000 ± 0.020
	m+7	n.d.	0.00360218	0.00345404	0.007 ± 0.001	0.00298133	0.00298076	n.d.	0.00245665	0.001 ± 0.003	0.000 ± 0.020
	m+8	n.d.	0.000701155	0.000661258	n.d.	0.000536801	0.000536888	n.d.	0.000412184	0.001 ± 0.004	0.000 ± 0.020
PRO286	m+0	0.601 ± 0.027	0.586496	0.579595	0.623 ± 0.053	0.60695	0.601821	n.a.	0.63416	n.a.	n.a.
	m+1	0.125 ± 0.007	0.156984	0.158481	0.130 ±0.011	0.157895	0.151207	n.a.	0.212326	n.a.	n.a.
	m+2	0.124 ± 0.010	0.172105	0.173945	0.107 ± 0.008	0.162371	0.181896	n.a.	0.105132	n.a.	n.a.
	m+3	0.108 ± 0.027	0.0628738	0.0649759	0.100 ± 0.049	0.0561861	0.0474226	n.a.	0.0389377	n.a.	n.a.
	m+4	0.027 ± 0.006	0.0158123	0.0169588	0.026 ±0.013	0.0118532	0.0139395	n.a.	0.00808089	n.a.	n.a.
	m+5	0.015 ± 0.005	0.0057296	0.0060448	0.014 ±0.008	0.00474568	0.0037145	n.a.	0.00136373	n.a.	n.a.
PRO258	m+0	0.643 ± 0.014	0.634578	0.629606	0.709 ± 0.003	0.648423	0.650983	n.a.	0.720993	0.989 ± 0.00217	n.a.
	m+1	0.165 ± 0.005	0.162573	0.160666	0.170 ± 0.003	0.168206	0.155757	n.a.	0.153714	0.000 ± 0.000	n.a.
	m+2	0.151 ± 0.005	0.162273	0.165709	0.099 ± 0.001	0.154194	0.162107	n.a.	0.0970938	0.009 ± 0.002	n.a.
	m+3	0.028 ± 0.003	0.0294823	0.0319233	0.018 ± 0.001	0.0211173	0.0220608	n.a.	0.022782	0.002 ± 0.000	n.a.
	m+4	0.014 ± 0.005	0.0110938	0.0120947	0.005 ± 0.001	0.00805979	0.00909202	n.a.	0.00541728	0.000 ± 0.000	n.a.
SER390	m+0	0.759 ± 0.098	0.743389	0.747479	0.717 ± 0.008	0.693907	0.740578	0.739 ± 0.015	0.769367	0.986 ± 0.012	0.961 ± 0.019
	m+1	0.082 ± 0.019	0.0926254	0.0909634	0.101 ± 0.005	0.150929	0.104636	0.080 ± 0.005	0.0873576	0.007 ± 0.007	0.032 ± 0.011
	m+2	0.078 ± 0.015	0.0709569	0.0693298	0.084 ± 0.004	0.130829	0.0843552	0.080 ± 0.002	0.0645444	0.003 ± 0.004	0.005 ± 0.001
	m+3	0.091 ± 0.004	0.093029	0.092228	0.098 ± 0.003	0.0243357	0.0704309	0.101 ± 0.002	0.0787315	0.004 ± 0.003	0.003 ± 0.000
SER362	m+0	0.760 ± 0.057	0.752482	0.756603	0.718 ± 0.004	0.70306	0.7499	0.746 ± 0.015	0.778692	0.977 ± 0.004	0.977 ± 0.020
	m+1	0.146 ± 0.019	0.152746	0.149454	0.167 ± 0.004	0.270855	0.177979	0.131 ± 0.005	0.141045	0 ± 0	0.000 ± 0.020
	m+2	0.114 ± 0.014	0.0947722	0.0939428	0.115 ± 0.003	0.0260852	0.0721216	0.123 ± 0.002	0.0802628	0.030 ± 0.004	0.023 ± 0.004
THR404	m+0	0.666 ± 0.023	0.664267	0.661456	0.718 ± 0.009	0.674035	0.669518	0.681 ± 0.016	0.712415	0.973 ± 0.017	0.951 ± 0.019
	m+1	0.147 ± 0.012	0.128178	0.12901	0.1367 ± 0.006	0.140925	0.147168	0.136 ± 0.006	0.157205	0.010 ± 0.012	0.001 ± 0.003
	m+2	0.121 ± 0.011	0.128116	0.127757	0.103 ± 0.003	0.109887	0.106096	0.108 ± 0.010	0.0668321	0.011± 0.009	0.042 ± 0.007
	m+3	0.054 ± 0.009	0.0601556	0.0620953	0.033 ± 0.002	0.0593842	0.0618912	0.059 ± 0.006	0.0533997	0.006 ± 0.003	0.006 ± 0.008
	m+4	0.012 ± 0.008	0.0192836	0.0196813	0.009 ± 0.001	0.0157686	0.0153269	0.017 ± 0.005	0.010148	0.002 ± 0.001	0.000 ± 0.020
THR376	m+0	0.721 ± 0.052	0.708504	0.706251	0.743 ± 0.009	0.720795	0.710008	0.708 ± 0.014	0.763538	0.951 ± 0.001	0.892 ± 0.018
	m+1	0.151 ± 0.021	0.148036	0.14813	0.148 ± 0.005	0.148951	0.156155	0.133 ± 0.012	0.139086	0.001 ± 0.003	0.094 ± 0.002
	m+2	0.129 ± 0.025	0.0968045	0.0976677	0.085 ±0.001	0.0882182	0.104348	0.117 ± 0.008	0.065345	0.042 ± 0.007	0.010 ± 0.001
	m+3	0.042 ± 0.008	0.0466553	0.0479515	0.024 ± 0.005	0.0420351	0.0294884	0.041 ± 0.011	0.032031	0.006 ± 0.008	0.004 ± 0.003
TYR466	m+0	0.575 ± 0.141	0.443139	0.448274	0.430 ±0.007	0.458734	0.459251	0.475 ± 0.010	0.488532	0.975 ± 0.011	n.a.
	m+1	0.126 ± 0.031	0.133612	0.133588	0.126 ± 0.003	0.138666	0.138269	0.116 ± 0.007	0.132937	0.006 ± 0.007	n.a.
	m+2	0.121 ± 0.010	0.102351	0.101736	0.120 ±0.006	0.101205	0.100847	0.131 ± 0.005	0.0964133	0.017 ± 0.006	n.a.
	m+3	0.121 ± 0.011	0.199759	0.198198	0.182 ± 0.007	0.190827	0.191179	0.178 ± 0.013	0.185237	0.006 ± 0.001	n.a.
	m+4	0.039 ± 0.015	0.0490335	0.0480803	0.059 ±0.006	0.0468335	0.0466691	0.057 ± 0.009	0.0409533	0.000 ± 0.000	n.a.
	m+5	0.022 ± 0.008	0.0378488	0.0369486	0.046 ± 0.005	0.034083	0.0340753	0.042 ± 0.007	0.0303181	0.000 ± 0.000	n.a.
	m+6	0.001 ± 0.010	0.0256246	0.0248976	0.001± 0.000	0.0223703	0.0224301	n.d.	0.0197154	0.000 ± 0.000	n.a.
	m+7	n.d.	0.00444472	0.00427297	0.000 ± 0.000	0.00389564	0.0038794	n.d.	0.00310595	0.000 ± 0.000	n.a.
	m+8	n.d.	0.00349317	0.00334931	n.d.	0.00285807	0.00286906	n.d.	0.00238102	0.000 ± 0.000	n.a.
	m+9	n.d.	0.000694001	0.00065451	n.d.	0.000526902	0.000529403	n.d.	0.000407978	0.000 ± 0.000	n.a.
TYR438	m+0	n.a.	0.448182	0.453374	0.443 ±0.010	0.464908	0.465189	0.496 ± 0.012	0.494088	0.965 ± 0.008	n.a.
	m+1	n.a.	0.131714	0.131618	0.142 ±0.005	0.137186	0.136725	0.121 ± 0.008	0.130389	0.002 ± 0.003	n.a.
	m+2	n.a.	0.187833	0.186674	0.186 ±0.005	0.180691	0.181068	0.193 ± 0.008	0.176648	0.031 ± 0.009	n.a.
	m+3	n.a.	0.136035	0.134564	0.140 ±0.006	0.130165	0.130081	0.138 ± 0.005	0.12291	0.007 ± 0.003	n.a.
	m+4	n.a.	0.0435996	0.0426541	0.059 ±0.004	0.0407182	0.0406311	0.052 ± 0.004	0.0356399	0.000 ± 0.000	n.a.
	m+5	n.a.	0.0400262	0.0390137	0.046 ±0.003	0.0356147	0.0356126	n.d.	0.0316416	0.000 ± 0.000	n.a.
	m+6	n.a.	0.00830652	0.00798706	n.d.	0.00720007	0.00717626	n.d.	0.00581424	0.000 ± 0.000	n.a.
	m+7	n.a.	0.00360212	0.00345405	n.d.	0.00297993	0.00298076	n.d.	0.00245667	0.000 ± 0.000	n.a.
	m+8	n.a.	0.000701141	0.000661259	n.d.	0.000536548	0.000536887	n.d.	0.000412187	0.000 ± 0.000	n.a.
VAL288	m+0	0.661 ± 0.017	0.649309	0.652426	0.652 ± 0.001	0.670232	0.670873	0.675 ± 0.013	0.694466	0.997 ± 0.001	0.981 ± 0.020
	m+1	0.042 ± 0.005	0.0593541	0.0596059	0.056 ±0.001	0.0495688	0.0489841	0.032 ± 0.002	0.0416926	0.000 ± 0.000	0.012 ± 0.003
	m+2	0.132 ± 0.007	0.134245	0.133009	0.137 ±0.001	0.128226	0.127665	0.135 ± 0.003	0.120398	0.002 ± 0.008	0.005 ± 0.001
	m+3	0.122 ± 0.007	0.12712	0.125683	0.122 ±0.001	0.125158	0.125699	0.125 ± 0.002	0.120368	0.001 ± 0.066	0.001 ± 0.000
	m+4	0.016 ± 0.002	0.00724775	0.0071574	0.010 ±0.001	0.00521305	0.00504854	0.008 ± 0.001	0.00361533	0.001 ± 0.0003	0.001 ± 0.000
	m+5	0.027 ± 0.002	0.0227242	0.0221184	0.024 ±0.001	0.0216025	0.0217301	0.026 ± 0.001	0.0194591	0.000 ± 0.000	0.000 ± 0.020
VAL260	m+0	0.648 ± 0.016	0.659429	0.662644	0.652 ±0.001	0.679258	0.679598	0.661 ± 0.013	0.702366	0.972 ± 0.004	0.972 ± 0.019
	m+1	0.042 ± 0.003	0.0571067	0.0572607	0.057 ±0.001	0.0453465	0.0447779	0.037 ± 0.002	0.0363956	0.002 ± 0.004	0.002 ± 0.004
	m+2	0.251 ± 0.010	0.249377	0.246748	0.246 ±0.001	0.245237	0.245518	0.258 ± 0.005	0.235489	0.002 ± 0.002	0.019 ± 0.002
	m+3	0.028 ± 0.017	0.0107445	0.0106076	0.018 ±0.001	0.00816061	0.00806415	0.016 ± 0.006	0.0060891	0.006 ± 0.004	0.006 ± 0.004
	m+4	0.031 ± 0.002	0.0233435	0.0227405	0.027 ±0.001	0.0219985	0.0220415	0.029 ± 0.001	0.0196597	0.000 ± 0.000	0.001 ± 0.000
